# Supplementary material for: Roles of HLA-DRB107 :01 and HLA-B15 :01 in the risk of acute Graft Versus Host Disease in pediatric patients undergoing HSCT
Source: Research Square preprint supplement (doi:10.21203/rs.3.rs-6821862/v1), 2025-06-25
Supplement: Supplementary file 1 [file cabc4ce9bd8c8cc0e1820217.xlsx]

## Sheet: Sheet1
Demographic characteristics		Cohorts
		Discovery	Replication
		Patients
		N (%)	N (%)
Centers	Sainte-Justine University Health Center, Montreal (Canada)	87 (100)	48 (31.2)
	Geneva University Hospital, Geneva (Switzerland)	–	4 (2.6)
	Robert Debré, University Hospital, Paris (France)	–	13 (8.4)
	Utrecht University Medical Center and Leiden University Medical Center (Netherlands)	–	48 (31.2)
	Alberta Children’s Hospital, Calgary (Canada)	–	41 (26.6)
Gender	Male	40 (46)	86 (55.8)
	Female	47 (54)	68 (44.2)
Ethnicity	European ancestry	62 (71.3)	122 (79.2)
	Other	25 (28.7)	31 (20.1)
	No available data	–	1 (0.6)
Diagnosis	Malignancies	45 (51.7)	82 (53.2)
	Non-Malignancies	42 (48.3)	72 (46.8)
HLA compatibility	Matched Unrelated donor	17 (19.1)	60 (39.0)
	Matched Related donor	33 (37.1)	41 (26.6)
	Unmatched donor	37 (41.6)	53 (34.4)
Stem Cell Source	BM	43 (49.4)	63 (40.9)
	PBSC	2 (2.3)	31 (20.1)
	Cord blood	42 (48.3)	57 (37.0)
	BM + PBSC	–	3 (2.0)
Conditioning	Bu/Cy	62 (71.3)	62 (40.3)
	Bu/Cy/VP16	5 (5.7)	5 (3.2)
	Bu/Flu	19 (21.8)	60 (39.0)
	Bu/Flu/Thiotepa	1 (1.1)	3 (1.9)
	Bu/Mel	–	1 (0.6)
	Bu/Mel/Cy	–	23 (14.9)
Chemotherapy Regimen	Myeloablative	68 (78.2)	94 (61.0)
	Myeloablative with reduced toxicity	16 (18.4)	52 (33.8)
	Non-Myeloablative	3 (3.4)	8 (5.2)
Total Body Irradiation	Yes	–	27 (17.5)
	No	–	127 (82.5)
aGVHD Grade II-IV	Yes	11 (12.6)	41 (26.6)
	No	76 (87.4)	113 (73.4)
Serotherapy	No serotherapy	23 (26.4)	21 (13.6)
	Antithymocyte Globulin	56 (64.4)	108 (70.1)
	Alemtuzumab (Campath)	8 (9.2)	2 (1.3)
	No available data	–	21 (13.6)
Age in years Median (Range)		7.4 (0.1–23.5)	6.1 (0.1 - 21)
сumAUC (mg×h/L) Median (Range)		59.6 (25.5–79.0)	60.8 (31.6-118.7)
