# Supplementary material for: Roles of HLA-DRB107 :01 and HLA-B15 :01 in the risk of acute Graft Versus Host Disease in pediatric patients undergoing HSCT
Source: Research Square preprint supplement (doi:10.21203/rs.3.rs-6821862/v1), 2025-06-25
Supplement: Supplementary file 2 [file fa35bd7fb7ea5d5554402bd6.xlsx]

## Sheet: Sheet1
Allele	Frequency	p-value
		Fisher	Log-Rank
HLA_A_01_01	12.6	0.625	0.598
HLA_A_01_107	5.7	1	0.402
HLA_A_02_01	33.3	0.611	0.597
HLA_A_03_01	16	0.177	0.817
HLA_A_11_01	13.7	0.428	0.421
HLA_A_23_01	16	0.305	0.308
HLA_A_26_01	8	0.214	0.184
HLA_A_30_01	5.7	0.5	0.481
HLA_A_31_01	5.7	0.5	0.565
HLA_A_32_01	5.7	0.5	0.542
HLA_B_07_02	23	0.576	0.447
HLA_B_08_01	14.9	0.352	0.282
HLA_B_15_01	13.8	0.041	0.009
HLA_B_18_01	11.5	0.349	0.21
HLA_B_35_01	11.4	0.647	0.525
HLA_B_40_01	5.7	1	0.386
HLA_B_44_02	11.5	0.195	0.105
HLA_B_44_03	9.2	1	0.989
HLA_B_51_01	5.7	0.5	0.639
HLA_C_03_03	6.8	1	0.65
HLA_C_03_04	10.3	0.318	0.458
HLA_C_04_01	23	0.251	0.016
HLA_C_05_01	17.2	0.681	0.561
HLA_C_06_02	14.9	0.692	0.757
HLA_C_07_01	20.6	0.47	0.432
HLA_C_07_02	26.4	0.721	0.909
HLA_C_12_03	9.2	1	0.906
HLA_C_16_01	5.7	1	0.392
HLA_C_17_01	5.7	1	0.368
HLA_DQA1_01_01	14.9	0.081	0.048
HLA_DQA1_01_02	37.9	0.424	0.289
HLA_DQA1_01_03	8	1	0.886
HLA_DQA1_02_01	21.8	0.012	0.002
HLA_DQA1_03_01	18.3	0.473	0.574
HLA_DQA1_03_03	5.7	1	0.392
HLA_DQA1_04_01	13.7	0.428	0.355
HLA_DQA1_05_01	29.8	0.657	0.585
HLA_DQA1_05_05	17.2	0.199	0.126
HLA_DQB1_02_01	29.8	0.084	0.005
HLA_DQB1_02_02	19.5	0.495	0.624
HLA_DQB1_03_01	21.8	0.581	0.621
HLA_DQB1_03_02	18.3	0.473	0.574
HLA_DQB1_03_03	5.7	0.5	0.53
HLA_DQB1_04_02	13.7	0.428	0.355
HLA_DQB1_05_01	23	0.099	0.082
HLA_DQB1_05_02	8	1	0.909
HLA_DQB1_06_02	25.2	0.114	0.11
HLA_DRB1_01_01	12.6	0.03	0.006
HLA_DRB1_03_01	29.8	0.758	0.776
HLA_DRB1_03_02	8	1	0.558
HLA_DRB1_04_01	10.3	1	0.973
HLA_DRB1_07_01	23	0.016	0.004
HLA_DRB1_08_01	5.7	1	0.392
HLA_DRB1_11_01	12.6	0.345	0.194
HLA_DRB1_13_01	6.9	0.567	0.803
HLA_DRB1_13_02	8	1	0.92
HLA_DRB1_15_01	17.2	0.392	0.275
HLA_DRB1_15_03	8	1	0.558
